# Supplementary material
Source: publisher site journal article supplement (https://www.dovepress.com/article/348929)
Supplement: Supplementary file 1 [file get_supplementary_file.php]

**Supplementary materials**

**Table S1** Descriptive Characteristics

| **Variables** | **Total**  N=7849 | **Digital usage** | | **χ2 /F** | ***p*** |
| --- | --- | --- | --- | --- | --- |
| **No**(N=1247) | **Yes**(N=6602) |
| *Mean(SD)/N(%)* | *Mean(SD)/N(%)* | *Mean(SD)/N(%)* |
| Bedtime(decimal) a | 22.54(1.05) | 22.04(1.00) | 22.64(1.04) | 356.314 | <.001 |
| Gender b |  |  |  | 17.081 | <.001 |
| female (%) | 3596(45.81) | 638(51.16) | 2958(44.8) |
| male (%) | 4253(54.19) | 609(48.84) | 3644(55.2) |
| Age a | 32.92(6.81) | 36.81(6.31) | 32.19(6.65) | 599.435 | <.001 |
| Education b |  |  |  | 1183.46 | <.001 |
| primary school or lower (%) | 1447(18.44) | 623(49.96) | 824(12.48) |
| middle school (%) | 2724(34.71) | 459(36.81) | 2265(34.31) |
| high school (%) | 1493(19.02) | 121(9.7) | 1372(20.78) |
| college and higher (%) | 2185(27.84) | 44(3.53) | 2141(32.43) |
| Marriage status b |  |  |  | 139.339 | <.001 |
| no (%) | 2112(26.91) | 166(13.31) | 1946(29.48) |
| yes (%) | 5737(73.09) | 1081(86.69) | 4656(70.52) |
| Health status b |  |  |  | 108.964 | <.001 |
| poor (%) | 488(6.22) | 136(10.91) | 352(5.33) |
| fair (%) | 785(10) | 189(15.16) | 596(9.03) |
| good (%) | 6576(83.78) | 922(73.94) | 5654(85.64) |
| BMI b |  |  |  | 11.231 | .011 |
| lean (%) | 622(7.92) | 75(6.01) | 547(8.29) |
| normal (%) | 4380(55.8) | 685(54.93) | 3695(55.97) |
| chubby (%) | 2178(27.75) | 381(30.55) | 1797(27.22) |
| obesity (%) | 669(8.52) | 106(8.5) | 563(8.53) |
| Chronic diseases b |  |  |  | .052 | .819 |
| no (%) | 7264(92.55) | 1156(92.7) | 6108(92.52) |
| yes (%) | 585(7.45) | 91(7.3) | 494(7.48) |
| CESD8 a | 13.33(3.49) | 13.7(3.83) | 13.25(3.42) | 70.745 | <.001 |
| Exercise |  |  |  | 115.615 | <.001 |
| no (%) | 4284(54.58) | 854(68.48) | 3430(51.95) |
| yes (%) | 3565(45.42) | 393(31.52) | 3172(48.05) |
| Smoking b |  |  |  | 1.229 | .268 |
| no (%) | 5301(67.54) | 859(68.89) | 4442(67.28) |
| yes (%) | 2548(32.46) | 388(31.11) | 2160(32.72) |
| Drinking b |  |  |  | .009 | .926 |
| no (%) | 6703(85.4) | 1066(85.49) | 5637(85.38) |
| yes (%) | 1146(14.6) | 181(14.51) | 965(14.62) |
| Resident b |  |  |  | 271.211 | <.001 |
| rural (%) | 3445(43.89) | 812(65.12) | 2633(39.88) |
| urban (%) | 4404(56.11) | 435(34.88) | 3969(60.12) |
| Children in family b |  |  |  | 47.258 | <.001 |
| no (%) | 2148(27.37) | 242(19.41) | 1906(28.87) |
| yes (%) | 5701(72.63) | 1005(80.59) | 4696(71.13) |
| Annual house income(log) a | 11.29(0.81) | 10.79(0.82) | 11.38(0.77) | 614.597 | <.001 |
| Nap b |  |  |  | 52.745 | <.001 |
| no (%) | 4157(52.98) | 778(62.39) | 3379(51.2) |
| yes (%) | 3690(47.02) | 469(37.61) | 3221(48.8) |
| Types of occupation b |  |  |  | 899.000 | <.001 |
| Management Personnel (%) | 593(7.56) | 45(3.61) | 548(8.3) |
| Technical Personnel (%) | 1068(13.61) | 36(2.89) | 1032(15.63) |
| General Staff (%) | 619(7.89) | 21(1.68) | 598(9.06) |
| Service Personnel (%) | 1724(21.96) | 165(13.23) | 1559(23.61) |
| Production personnel (%) | 1619(20.63) | 623(49.96) | 996(15.09) |
| Transportation personnel (%) | 2165(27.58) | 350(28.07) | 1815(27.49) |
| Others (%) | 61(0.78) | 7(0.56) | 54(0.82) |

**Notes**: “a” this variable was computed as a continuous variable, data were presented as the means (standard deviation: S.D.); “b” this variable was computed as a category variable, data were presented as the number (the percent of each category: %)

**Table S2** Participants’ Sleep Issues and Univariate Analysis

| **variables** | **Average sleep duration** | | | ***χ2/F***  ***(p)*** | **bedtime** | | | ***χ2/F***  ***(p)*** |
| --- | --- | --- | --- | --- | --- | --- | --- | --- |
| **short**(N=2044) | **normal**(4653) | **long**(1152) |  | **early**(3449) | **normal**(3921) | **late**(1270) |  |
| Digital usage b | |  |  | 40.809  (<.001) |  |  |  | 312.996 (<.001) |
| No | 348(17.03) | 652(14.01) | 247(21.44) | 851(23.77) | 284(10.37) | 112(7.32) |
| Yes | 1696(82.97) | 4001(85.99) | 905(78.56) | 2729(76.23) | 2454(89.63) | 1419(92.68) |
| Online learn b | |  |  | 50.183  (<.001) |  |  |  | 345.109  (<.001) |
| No | 1005(49.17) | 2077(44.64) | 644(55.90) | 2106(58.83) | 1073(39.19) | 547(35.73) |
| Yes | 1039(50.83) | 2576(55.36) | 508(44.10) | 1474(41.17) | 1665(60.81) | 984(64.27) |
| Online work b | |  |  | 71.688  (<.001) |  |  |  | 497.885  (<.001) |
| No | 1051(56.56) | 2103(49.15) | 672(64.15) | 2222(62.07) | 1115(40.72) | 489(31.94) |
| Yes | 993(43.44) | 2550(50.85) | 480(35.85) | 1358(37.93) | 1623(59.28) | 1042(68.06) |
| Online socialization b | |  |  | 38.203  (<.001) |  |  |  | 359.149  (<.001) |
| No | 434(21.23) | 825(17.73) | 293(25.43) | 1036(28.94) | 372(13.59) | 144(9.41) |
| Yes | 1610(78.77) | 3827(82.27) | 859(74.57) | 2544(71.06) | 2366(86.41) | 1386(90.59) |
| Online entertainment b | |  |  | 44.245  <.001 |  |  |  | 347.714  (<.001) |
| No | 468(22.90) | 852(18.31) | 303(26.30) | 1071(29.92) | 383(13.99) | 169(11.04) |
| Yes | 1576(77.10) | 3801(81.69) | 849(73.70) | 2509(70.08) | 2355(86.01) | 1362(88.96) |
| Online shopping b | |  |  | 49.810  <.001 |  |  |  | 461.591  (<.001) |
| No | 668(32.68) | 1296(27.86) | 437(37.93) | 1523(42.55) | 625(22.83) | 253(16.53) |
| yes | 1376(67.32) | 3356(72.14) | 715(62.07) | 2056(58.45) | 2113(77.17) | 1278(83.47) |
| Frequency a | 15.64±9.56 | 16.93±9.31 | 14.30±9.59 | 40.938  (<.001) | 13.02±9.41 | 17.75±8.63 | 19.48±8.05 | 408.131  (<.001) |
| Duration a | 11.81±12.06 | 12.43±11.72 | 12.18±12.91 | 1.913  (.148) | 9.82±10.83 | 13.06±11.56 | 16.37±13.87 | 177.540  (<.001) |

Continue Table S2

| **variables** | **sleep quality** | | | | ***χ2/F***  ***(p)*** |
| --- | --- | --- | --- | --- | --- |
| **mostly poor** (354) | **constantly poor** (907) | **Fair** (2721) | **Good** (3867) |
| Digital usage b | |  |  |  | 16.872  (.001) |
| No | 63(17.80) | 113(12.46) | 403(14.81) | 668(17.27) |
| Yes | 291(82.20) | 794(87.54) | 2318(85.19) | 3199(86.73) |
| Online learning b | |  |  |  | 13.820  (.003) |
| No | 191(53.95) | 396(43.66) | 1265(46.49) | 1874(48.46) |
| Yes | 163(46.05) | 511(56.34) | 1456(53.51) | 1993(51.54) |
| Online working b | |  |  |  | 8.985  (.029) |
| No | 174(49.15) | 409(45.09) | 1302(47.85) | 1941(50.19) |
| Yes | 180(50.85) | 498(54.91) | 1419(52.15) | 1926(49.81) |
| Online socialization b | |  |  |  | 20.046  (<.001) |
| No | 85(24.01) | 156(17.20) | 486(17.86) | 825(21.34) |
| Yes | 269(75.99) | 751(82.80) | 2235(82.14) | 3041(78.66) |
| Online entertainment b | |  |  |  | 22.346  (<.001) |
| No | 91(25.71) | 161(17.75) | 510(18.74) | 861(22.27) |
| Yes | 263(74.29) | 746(82.25) | 2211(81.26) | 3006(77.73) |
| Online shopping b | |  |  |  | 32.209  (<.001) |
| No | 118(33.33) | 242(26.68) | 753(27.67) | 1288(33.32) |
| yes | 236(66.67) | 665(73.32) | 1968(72.33) | 2578(66.68) |
| Frequency a | 15.35±9.83 | 17.08±9.31 | 16.51±9.26 | 15.87±9.60 | 6.193  (<.001) |
| Duration a | 13.82±15.18 | 13.24±12.68 | 11.96±11.50 | 12.04±11.81 | 5.004  (.002) |

**Note:** “a” this variable was computed as a continuous variable, data were presented as the means (standard deviation: S.D.); “b” this variable was computed as a category variable, data were presented as the number (the percent of each category: %)

* *p* < 0.05, ** *p* < 0.01, *** *p* < 0.001

**Table S3** The Multilevel Model of sleep indicators

|  | Sleep duration | | | | Bedtime | | | Sleep quality | |
| --- | --- | --- | --- | --- | --- | --- | --- | --- | --- |
|  | coefficient | SE | | | coefficient | SE | coefficient | | SE |
| Fix effects |  |  | | |  |  |  | |  |
| intercept | 7.850*** | .013 | | | 22.563*** | .013 | 3.286*** | | .010 |
| Random effects |  |  | | |  |  |  | |  |
| Level2 (family) | .156 | .028 | | | .499 | .024 | .069 | | .016 |
| Level1 (individual) | 1.161 | .032 | | | .620 | .019 | .637 | | .018 |
| Observations | 7849 | | 7849 | | | | 7849 | | |
| Observation group | 5784 | | 5784 | | | | 5784 | | |
| ICC | .119 | | | .446 | | | .098 | | |

**Notes:** (1) * *p* < 0.05, ** *p* < 0.01, *** *p* < 0.001

(2) ﻿ICC = intraclass correlation coefficient.

**Abbreviations**: SE, standard error.

**Table S4** digital activities and bedtime, sleep quality (robustness check using bedtime and sleep quality as continuous variable)

|  | **bedtime** | | | | | **sleep quality** | | | | | |
| --- | --- | --- | --- | --- | --- | --- | --- | --- | --- | --- | --- |
|  | **unadjusted model** | | **adjusted model** | | | **unadjusted model** | | | **adjusted model** | | |
|  | **β [95%CI]** | ***p*** | | **β [95%CI]** | ***p*** | **β [95%CI]** | ***p*** | **β [95%CI]** | | ***p*** |
| **Digital usage** (ref: no) |  | | | | |  |  |  | |  |
| yes | .064***[.472, .596] | <.001 | | .183***[.119, .248] | <.001 | -.064*[-.151, -.013] | .014 | -.109***[-.156, -.063] | | <.001 |
| **frequency** | .032***[.029, .034] | <.001 | | .014***[.011, .017] | <.001 | -.002*[-.004, -.001] | .040 | -.006***[-.009, -.004] | | <.001 |
| **duration weekly** | .018***[.016, .020] | <.001 | | .009**[.007, .011] | <.001 | -.002**[-.004, -.001] | .002 | -.002**[-.004, -.001] | | .001 |
| **frequency of each digital activity** | | | | | |  |  |  | |  |
| learning | .389***[.344, .434] | <.001 | | .015**[.005, .025] | .004 | -.001[-.008, .007] | .828 | -.009*[-.016, -.001] | | .021 |
| working | .496***[.451, .541] | <.001 | | .031*[.022, .041] | .041 | -.007[-.013, .000] | .057 | -.016***[-.023, -.009] | | <.001 |
| socialization | .536***[.480, .593] | <.001 | | .041***[.031, .051] | <.001 | -.006[-.013, .002] | .174 | -.016***[-.023, -.008] | | <.001 |
| entertainment | .504***[.449, .560] | <.001 | | . 033***[.022, .043] | <.001 | -.005[-.013, .003] | .256 | -.015***[-.022, -.007] | | <.001 |
| shopping | .508***[.459, .557] | <.001 | | .050***[.039, .062] | <.001 | -.016***[-.025, -.007] | <.001 | -.024***[-.032, -.015] | | <.001 |

**Notes:** *The results were quantified by* β*, with a confidence interval in square brackets.*

**p < .05, **p < .01, ***p < .001.*

*unadjusted models only included independent variables.*

*adjusted models adjusted for demographic, socioeconomic, health-related, and lifestyle variables*

**Abbreviation**: CI, confidence interval.

**Table S5** type of digital activities and sleep issues (robustness check using type of digital activity)

|  | **Average sleep duration** | | | | **Workday sleep duration** | | | | **Free-day sleep duration** | | | | | |
| --- | --- | --- | --- | --- | --- | --- | --- | --- | --- | --- | --- | --- | --- | --- |
|  | **unadjusted model** | | **adjusted model** | | **unadjusted model** | | **adjusted model** | | **unadjusted model** | | | **adjusted model** | | |
|  | **OR [95%CI]** | ***p*** | **OR [95%CI]** | ***p*** | **OR [95%CI]** | ***p*** | **OR [95%CI]** | ***p*** | **OR [95%CI]** | ***p*** | **OR [95%CI]** | | ***p*** |
| **types of digital activities (ref: no)** | | | | | | | | | | | | | | |
| learning | .912[.829, 1.003] | .057 | .976[.872, 1.091] | .666 | .718***[.654, .789] | <.001 | .883*[.791, .985] | .026 | 1.112**[1.014, 1.220] | .024 | .981[.880, 1.094] | | .732 |
| working | .930[.845, 1.022] | .133 | 1.068[.947, 1.205] | .203 | .714***[.650, .784] | <.001 | .952[.847, 1.071] | .412 | 1.211***[1.103, 1.329] | <.001 | 1.139*[1.013, 1.280] | | .029 |
| socialization | .922[.817, 1.040] | .186 | .929[.811, 1.064] | .290 | .709***[.630, .797] | <.001 | .846*[.742, .965] | .013 | 1.206**[1.074, 1.354] | .002 | 1.006[.884, 1.146] | | .922 |
| entertainment | .961[.845, 1.083] | .517 | .984[.860, 1.125] | .811 | .747***[.666, .839] | <.001 | .910[.799, 1.036] | .154 | 1.274***[1.137, 1.427] | <.001 | 1.089[.958, 1.237] | | .193 |
| Shopping | .930[.838, 1.032] | .170 | .940[.833, 1.062] | .320 | .734***[.663, .812] | <.001 | .884*[.786, .995] | .041 | 1.200***[1.086, 1.326] | <.001 | 1.013[.901, 1.139] | | .825 |

continue table S5

|  | **bedtime** | | | | **sleep quality** | | | | | |
| --- | --- | --- | --- | --- | --- | --- | --- | --- | --- | --- |
|  | **unadjusted model** | | **adjusted model** | | **unadjusted model** | | **adjusted model** | | | |
|  | **OR [95%CI]** | ***p*** | **OR [95%CI]** | ***p*** | **OR [95%CI]** | ***p*** | | **OR [95%CI]** | | ***p*** | |
| **types of digital activities** (ref: no) | | | | |  | | | |  | |
| learning | 2.618*** [2.322, 2.953] | <.001 | 1.266***[1.108, 1.446] | .001 | .941[.859, 1.031] | .194 | | .853**[.763, .955] | | .006 | |
| working | 3.270*** [2.898, 3.689] | <.001 | 1.456***[1.264, 1.677] | <.001 | .887*[.809, .972] | .010 | | .757***[.672, .854] | | <.001 | |
| socialization | 3.921***[3.329, 4.618] | <.001 | 1.745***[1.473, 2.067] | <.001 | .861*[.767, .968] | .012 | | .730***[.638, .837] | | <.001 | |
| entertainment | 3.666***[3.127, 4.298] | <.001 | 1.595***[1.351, 1.882] | <.001 | .862*[.769, .966] | .011 | | .733***[.641, .839] | | <.001 | |
| shopping | 3.495***[3.059, 3.994] | <.001 | 1.699***[1.468, 1.966] | <.001 | .800*** [.724, .885] | <.001 | | .702***[.622, .793] | | <.001 | |

**Notes:** *The results were quantified by OR, with a confidence interval in square brackets.*

**p < .05, **p < .01, ***p < .001.*

*unadjusted models only included independent variables.*

*adjusted models adjusted for demographic, socioeconomic, health-related, and lifestyle variables*

**Abbreviations**: CI, confidence interval; OR, odds ratio.
